# Supplementary material for: Retinal microglia express more MHC class I and promote greater T-cell-driven inflammation than brain microglia
Source: Front Immunol. 2024 May 10;15:1399989. doi: 10.3389/fimmu.2024.1399989 (PMC11116593; doi:10.3389/fimmu.2024.1399989)
Supplement: Supplementary file 4 [file Table_3.xlsx]

## Sheet: Mg1
	p_val	avg_log2FC	pct.1	pct.2	p_val_adj
Rps29	0	0.500678	0.999	0.97	0
mt-Nd1	0	0.585294	0.995	0.936	0
mt-Nd2	0	0.621191	0.998	0.958	0
mt-Co1	0	0.560916	1	0.982	0
mt-Co2	0	0.597732	1	0.983	0
mt-Atp6	0	0.586949	1	0.987	0
mt-Co3	0	0.610318	1	0.985	0
mt-Nd4	0	0.594101	0.998	0.952	0
mt-Cytb	0	0.575896	0.999	0.98	0
mt-Nd3	4.80541e-232	0.52527	0.948	0.806	1.60991e-227
Rps21	3.25492e-217	0.466134	0.994	0.94	1.09046e-212
Rpl35a	3.62999e-203	0.434598	0.996	0.94	1.21612e-198
Rpl37a	2.86204e-201	0.446209	0.995	0.937	9.5884e-197
Rpl39	9.70551e-201	0.463741	0.994	0.924	3.25154e-196
mt-Nd5	2.48674e-200	0.511353	0.923	0.766	8.33108e-196
Rps27	1.40458e-197	0.454736	0.991	0.93	4.70563e-193
mt-Nd4l	1.1449e-179	0.503984	0.891	0.721	3.83563e-175
Rps28	2.89979e-178	0.4444	0.991	0.917	9.71487e-174
Rpl26	5.01756e-173	0.433105	0.988	0.916	1.68098e-168
Klf6	8.72718e-101	-0.561243	0.916	0.934	2.92378e-96
Ier2	8.98978e-99	-0.820211	0.695	0.792	3.01176e-94
Neat1	7.84344e-77	-0.579243	0.757	0.818	2.62771e-72
Hspa1a	3.38391e-66	-1.19521	0.449	0.577	1.13368e-61
Klf2	9.01661e-65	-0.555864	0.899	0.904	3.02074e-60
Ccl3	1.71859e-64	-0.964047	0.489	0.602	5.75764e-60
Adamts1	6.36348e-63	-1.07597	0.21	0.344	2.13189e-58
Ccl4	2.33135e-58	-1.30215	0.473	0.581	7.81047e-54
Hspa8	2.6648e-58	-0.497258	0.978	0.961	8.9276e-54
Pdgfb	6.51757e-57	-0.485013	0.64	0.723	2.18352e-52
Sgk1	2.39636e-56	-0.472239	0.815	0.852	8.0283e-52
Otud1	2.49029e-53	-0.658955	0.279	0.41	8.34297e-49
Ccl2	1.62209e-50	-0.887701	0.199	0.318	5.43434e-46
Hspa1b	8.97109e-45	-1.20504	0.317	0.421	3.00549e-40
Egr2	1.16651e-40	-0.444274	0.157	0.26	3.90805e-36
Ddit3	2.35162e-40	-0.439787	0.158	0.26	7.8784e-36
Hsp90aa1	2.04231e-39	-0.612208	0.871	0.884	6.84215e-35
Ccl12	2.21591e-39	-0.776362	0.352	0.46	7.42376e-35
Dnajb1	7.85247e-33	-0.640223	0.563	0.638	2.63074e-28
Tnf	2.06689e-32	-0.461708	0.196	0.293	6.92451e-28
Atf3	3.17232e-29	-0.684712	0.794	0.826	1.06279e-24
Tmx4	2.47344e-28	-0.442571	0.841	0.855	8.28651e-24
Cd83	3.97812e-27	-0.75182	0.226	0.308	1.33275e-22
Marcksl1	9.25607e-26	-0.573797	0.2	0.281	3.10097e-21
Cebpb	9.00399e-24	-0.698971	0.179	0.251	3.01652e-19
Atp6v0c	4.6863e-23	-0.639543	0.191	0.264	1.57e-18
Id2	9.30203e-23	-0.472626	0.292	0.372	3.11637e-18
Dnaja1	1.64666e-22	-0.62532	0.721	0.754	5.51663e-18
Il1a	2.55891e-22	-0.538521	0.358	0.438	8.57285e-18
Ifrd1	8.99258e-16	-0.539187	0.294	0.354	3.01269e-11

## Sheet: Mg2
	p_val	avg_log2FC	pct.1	pct.2	p_val_adj
mt-Nd1	0	-1.00128	0.906	0.976	0
mt-Nd2	0	-1.0751	0.937	0.985	0
mt-Co1	0	-0.99116	0.979	0.992	0
mt-Co2	0	-1.09545	0.976	0.993	0
mt-Atp6	0	-1.12027	0.986	0.994	0
mt-Co3	0	-1.08741	0.981	0.993	0
mt-Nd3	0	-0.915108	0.721	0.906	0
mt-Nd4	0	-1.01492	0.934	0.981	0
mt-Cytb	0	-1.02943	0.974	0.991	0
mt-Nd4l	1.13593e-278	-0.854751	0.612	0.844	3.80558e-274
mt-Nd5	3.92012e-266	-0.770851	0.679	0.874	1.31332e-261
Rps21	1.475e-179	-0.45061	0.973	0.95	4.94155e-175
Rps28	6.82357e-148	-0.437267	0.957	0.933	2.28603e-143
mt-Atp8	1.04388e-114	-0.550418	0.276	0.504	3.49722e-110
Klf6	6.13781e-79	0.461616	0.95	0.918	2.05629e-74
Tmx4	1.05132e-68	0.490758	0.882	0.837	3.52212e-64
Hspa1a	3.18747e-53	0.857289	0.6	0.509	1.06787e-48
Apoe	3.20955e-49	-1.56378	0.375	0.5	1.07526e-44
Klf2	3.53746e-45	0.445577	0.918	0.896	1.18512e-40
Lyz2	3.93896e-44	-0.556202	0.414	0.545	1.31963e-39
Hspa1b	7.91384e-42	0.854624	0.454	0.36	2.65129e-37
Hsp90aa1	1.34708e-36	0.496603	0.893	0.874	4.51297e-32
Dnaja1	7.39911e-32	0.555956	0.763	0.735	2.47885e-27
Dnajb1	9.16998e-32	0.547158	0.653	0.597	3.07213e-27
Ier2	4.4402e-26	0.43794	0.777	0.755	1.48756e-21

## Sheet: Mg3
	p_val	avg_log2FC	pct.1	pct.2	p_val_adj
Ccl3	1.61052e-133	0.763221	0.753	0.512	5.39557e-129
Ccl4	4.9464e-122	0.82904	0.732	0.494	1.65714e-117
Tnf	9.52916e-102	0.516709	0.424	0.216	3.19246e-97
Id2	1.1197e-92	0.651533	0.51	0.299	3.75122e-88
Ier3	1.85215e-83	0.505609	0.612	0.393	6.20508e-79
Egr3	1.81505e-79	0.522046	0.309	0.149	6.08076e-75
Adamts1	1.69502e-70	0.599654	0.437	0.262	5.67866e-66
Ccl2	9.48938e-63	0.533378	0.411	0.243	3.17913e-58
Cd63	2.70181e-61	0.52003	0.806	0.63	9.05161e-57
Il1a	1.25585e-60	0.453502	0.566	0.369	4.20735e-56
Marcksl1	2.03778e-58	0.451418	0.383	0.219	6.82698e-54
Cd83	7.91689e-57	0.640738	0.409	0.246	2.65232e-52
Lyz2	1.14728e-44	0.486742	0.646	0.465	3.84363e-40
Apoe	1.24125e-25	1.09626	0.549	0.437	4.15843e-21

## Sheet: Mg4
	p_val	avg_log2FC	pct.1	pct.2	p_val_adj
Snap25	0	1.02805	0.385	0.036	0
Snhg11	0	1.68286	0.478	0.051	0
Gria2	0	0.739531	0.263	0.017	0
Meg3	0	2.12784	0.594	0.078	0
Nrgn	4.0131e-282	0.914354	0.344	0.041	1.34447e-277
C230004F18Rik	2.61986e-216	0.800855	0.341	0.054	8.77705e-212
Gm42418	8.86233e-142	0.673228	1	0.997	2.96906e-137
Plp1	2.32899e-138	0.684204	0.292	0.059	7.80259e-134
Lars2	9.73242e-51	0.556129	0.858	0.652	3.26056e-46
Klf6	1.35289e-15	-0.436837	0.942	0.927	4.53244e-11
Ier2	9.73661e-08	-0.516056	0.765	0.761	0.00326196
Apoe	1.22571e-06	-0.81001	0.566	0.455	0.0410638

## Sheet: Mg5
	p_val	avg_log2FC	pct.1	pct.2	p_val_adj
Tsix	1.60042e-18	1.57666	0.447	0.459	5.36172e-14
Gm26532	1.15531e-08	1.27956	0.493	0.624	0.000387052
Xist	2.75003e-152	1.25562	0.938	0.973	9.21315e-148
Malat1	0	1.11903	0.997	1	0
Son	4.74517e-64	0.932253	0.829	0.968	1.58973e-59
AC149090.1	2.81027e-08	0.913693	0.577	0.807	0.000941497
H2-D1	1.44922e-06	0.866485	0.621	0.873	0.0485516
mt-Atp6	1.07831e-83	0.854329	0.929	0.995	3.61257e-79
Ier2	3.02312e-08	0.827483	0.598	0.772	0.00101281
mt-Co2	1.84395e-82	0.801986	0.93	0.992	6.1776e-78
mt-Cytb	5.27912e-65	0.776789	0.917	0.99	1.76861e-60
Ptprc	3.26974e-11	0.776779	0.617	0.859	1.09543e-06
Smad7	6.89956e-07	0.771617	0.617	0.843	0.0231149
mt-Nd2	2.59917e-52	0.770413	0.863	0.977	8.70773e-48
mt-Co3	5.17114e-66	0.763821	0.926	0.993	1.73244e-61
Ccnl1	2.58892e-19	0.759477	0.68	0.888	8.67342e-15
Ier5	1.5444e-45	0.725815	0.863	0.982	5.17404e-41
mt-Nd3	3.41054e-07	0.705591	0.636	0.864	0.011426
Junb	3.05787e-46	0.694847	0.939	0.995	1.02445e-41
Mlxipl	7.84653e-09	0.663057	0.202	0.382	0.000262874
Hnrnpa2b1	8.20656e-17	0.621888	0.793	0.972	2.74936e-12
Jmjd1c	2.58294e-09	0.604604	0.736	0.935	8.65336e-05
Spag9	4.29858e-08	0.603782	0.262	0.484	0.00144011
Taf1d	1.48565e-06	0.596438	0.274	0.484	0.0497721
Ranbp2	2.74488e-08	0.59295	0.245	0.451	0.000919591
mt-Nd1	4.02816e-18	0.575361	0.813	0.964	1.34951e-13
Tm9sf4	5.49975e-08	0.569129	0.177	0.328	0.00184252
Fosb	4.36395e-16	0.568594	0.848	0.968	1.46201e-11
mt-Nd4	2.33665e-23	0.552607	0.826	0.975	7.82824e-19
Atp1a1	1.17231e-07	0.548827	0.236	0.43	0.00392747
Adcy7	1.35912e-06	0.541393	0.155	0.278	0.0455332
Ctsl	8.87769e-12	0.537164	0.769	0.98	2.9742e-07
Nrd1	1.20363e-07	0.536025	0.169	0.309	0.0040324
Impact	4.23765e-07	0.533006	0.235	0.414	0.014197
Ino80d	2.37809e-10	0.527511	0.166	0.331	7.96708e-06
Stat3	1.04138e-08	0.523254	0.224	0.415	0.000348885
Nktr	7.73842e-07	0.521805	0.341	0.619	0.0259253
Swt1	1.70565e-09	0.503829	0.138	0.275	5.71428e-05
Snx29	3.2068e-07	0.502048	0.188	0.34	0.0107434
Pkn1	1.48128e-11	0.500655	0.238	0.476	4.96258e-07
Pnpla7	2.01108e-09	0.497618	0.209	0.401	6.7375e-05
Dgkd	2.10379e-11	0.496359	0.221	0.441	7.04812e-07
Stab1	1.78322e-08	0.494349	0.285	0.533	0.000597414
R3hdm1	2.2677e-10	0.492534	0.181	0.357	7.59725e-06
Taf15	5.58719e-13	0.491487	0.204	0.424	1.87182e-08
Mef2c	2.31054e-12	0.491004	0.837	0.985	7.74078e-08
Ddx50	1.14522e-09	0.4862	0.275	0.522	3.83671e-05
Havcr2	2.89914e-08	0.481573	0.336	0.631	0.00097127
Ier3	5.74074e-07	0.480347	0.279	0.452	0.0192326
Pid1	1.17799e-09	0.475762	0.188	0.365	3.94649e-05
Nufip2	7.76682e-09	0.475696	0.225	0.419	0.000260204
Krit1	1.67228e-08	0.474939	0.196	0.366	0.000560248
H2-T23	7.15213e-09	0.474266	0.267	0.505	0.000239611
Avl9	7.89104e-07	0.473665	0.192	0.342	0.0264366
mt-Co1	6.99678e-29	0.473106	0.914	0.993	2.34406e-24
Galnt11	9.92063e-09	0.470032	0.173	0.327	0.000332361
Rbm39	1.53518e-12	0.468654	0.779	0.974	5.14315e-08
H3f3b	1.35061e-08	0.468383	0.947	0.999	0.000452482
Zranb1	5.5974e-07	0.462493	0.138	0.252	0.0187524
Jun	6.16372e-47	0.461826	0.975	0.999	2.06497e-42
Nsd1	6.62078e-11	0.46137	0.26	0.508	2.21809e-06
4932438A13Rik	5.87834e-07	0.458884	0.138	0.252	0.0196936
Nisch	3.05495e-11	0.458453	0.273	0.537	1.02347e-06
Herc1	8.23917e-11	0.455534	0.186	0.369	2.76029e-06
Slc12a9	8.72752e-09	0.454519	0.198	0.373	0.000292389
Runx1	1.30577e-08	0.448823	0.378	0.697	0.00043746
Hspa5	8.23176e-09	0.447264	0.808	0.973	0.000275781
Zufsp	6.55853e-12	0.444555	0.158	0.33	2.19724e-07
Mast3	1.65629e-10	0.444246	0.157	0.315	5.54889e-06
P2rx4	1.25205e-09	0.443249	0.17	0.332	4.19461e-05
Pald1	1.16951e-11	0.442273	0.202	0.404	3.91809e-07
Slc38a10	4.77144e-08	0.441216	0.155	0.29	0.00159853
Ubn1	2.61188e-11	0.438623	0.183	0.365	8.75031e-07
Chd7	1.90972e-09	0.436069	0.24	0.454	6.39795e-05
Atp8a2	1.05265e-11	0.435238	0.199	0.401	3.52658e-07
Rel	2.84708e-11	0.434993	0.267	0.514	9.53829e-07
Pdgfb	9.52315e-08	0.43424	0.398	0.716	0.00319044
Htra2	9.54392e-11	0.432979	0.128	0.268	3.19741e-06
Idh3g	2.34429e-55	-0.434695	0.05	0.349	7.85385e-51
Cetn3	8.41362e-52	-0.434798	0.04	0.317	2.81873e-47
Ppp1ca	2.5201e-79	-0.435291	0.115	0.553	8.44285e-75
Tmem30a	2.0732e-73	-0.435604	0.111	0.526	6.94563e-69
Txndc17	1.74038e-52	-0.435652	0.049	0.336	5.83063e-48
Atp5o.1	5.60606e-45	-0.436684	0.029	0.269	1.87814e-40
Bag1	3.91627e-60	-0.438364	0.047	0.363	1.31203e-55
Ndufs8	7.02757e-51	-0.438371	0.038	0.309	2.35438e-46
Rab2a	5.1495e-71	-0.438444	0.12	0.535	1.72519e-66
Mzt2	2.08009e-45	-0.438447	0.025	0.263	6.96871e-41
Atp5g3	2.22732e-52	-0.438953	0.033	0.306	7.46198e-48
Ube2r2	2.26804e-45	-0.439246	0.033	0.278	7.59839e-41
Anapc13	2.80673e-56	-0.440251	0.04	0.333	9.40312e-52
Pgam1	6.89402e-55	-0.441179	0.045	0.337	2.30963e-50
Myl12a	1.36514e-57	-0.441622	0.066	0.387	4.5735e-53
Rad21	2.01154e-47	-0.442586	0.037	0.293	6.73905e-43
Nfe2l2	3.61272e-80	-0.44414	0.171	0.656	1.21033e-75
Nenf	9.40198e-45	-0.444929	0.021	0.253	3.14985e-40
Stard3nl	3.28439e-50	-0.446217	0.054	0.336	1.10034e-45
Tmco1	1.23758e-80	-0.446679	0.116	0.558	4.14615e-76
Sla	4.03069e-67	-0.450726	0.094	0.474	1.35036e-62
Ndufb4	1.6892e-62	-0.4521	0.053	0.381	5.65917e-58
Cyfip1	3.21955e-60	-0.452368	0.449	0.946	1.07861e-55
Ndufb5	1.42496e-59	-0.452971	0.042	0.351	4.77388e-55
Polr2g	7.83722e-45	-0.45315	0.028	0.266	2.62563e-40
Syf2	4.59995e-63	-0.454446	0.072	0.419	1.54108e-58
Arl1	2.3539e-65	-0.454459	0.061	0.406	7.88603e-61
Ubl5	1.37476e-78	-0.454727	0.137	0.59	4.60573e-74
Dnaja2	2.61325e-59	-0.455304	0.042	0.35	8.7549e-55
Arpc5	1.20603e-77	-0.455399	0.087	0.496	4.04044e-73
Ndufab1	6.32303e-61	-0.456241	0.045	0.36	2.11834e-56
Timp2	2.55507e-74	-0.457661	0.306	0.849	8.55999e-70
Cap1	8.56867e-68	-0.457943	0.104	0.493	2.87068e-63
Mylip	3.35193e-74	-0.458553	0.253	0.767	1.12296e-69
Ccni	1.34327e-75	-0.459819	0.105	0.522	4.50022e-71
Psmb4	8.89119e-58	-0.461282	0.054	0.365	2.97873e-53
Cd52	1.66635e-65	-0.461331	0.155	0.571	5.5826e-61
Supt4a	4.76527e-64	-0.462612	0.047	0.377	1.59646e-59
Rala	8.7392e-54	-0.463001	0.032	0.309	2.92781e-49
Psmb6	6.15823e-61	-0.463648	0.062	0.392	2.06313e-56
Rilpl1	5.9722e-51	-0.463657	0.036	0.305	2.00081e-46
Snrpe	1.61766e-62	-0.463832	0.054	0.384	5.41949e-58
Ccl6	1.052e-57	-0.464541	0.072	0.398	3.52443e-53
Eif3k	2.424e-67	-0.464974	0.061	0.413	8.1209e-63
Mdh1	9.06929e-61	-0.465485	0.05	0.37	3.0384e-56
Rpl36al	2.49047e-79	-0.46659	0.103	0.528	8.34358e-75
Eif5a	3.05186e-73	-0.466893	0.112	0.529	1.02244e-68
Pdcd10	5.26835e-63	-0.467814	0.062	0.4	1.765e-58
Dnajc7	8.00942e-79	-0.468206	0.13	0.579	2.68332e-74
Selenof	1.24192e-82	-0.468537	0.183	0.689	4.16067e-78
Prdx1	1.01165e-70	-0.468642	0.104	0.504	3.38924e-66
Scp2	5.41292e-62	-0.46895	0.059	0.39	1.81344e-57
Anxa3	1.28497e-74	-0.470632	0.328	0.867	4.3049e-70
Skp1a	4.58971e-51	-0.471003	0.038	0.31	1.53764e-46
Mrps21	2.39003e-47	-0.471274	0.024	0.268	8.00709e-43
2410015M20Rik	9.95991e-49	-0.473298	0.03	0.286	3.33677e-44
Rac1	2.42212e-86	-0.473702	0.245	0.8	8.11457e-82
Eef1d	1.67305e-78	-0.477379	0.113	0.547	5.60504e-74
Cwc15	3.4032e-56	-0.477846	0.046	0.345	1.14014e-51
Atp5d	8.52125e-68	-0.478223	0.072	0.435	2.85479e-63
Txnl1	1.64544e-60	-0.478399	0.047	0.364	5.51254e-56
Ndufs5	5.80879e-60	-0.479548	0.032	0.333	1.94606e-55
Ndufs6	1.79147e-48	-0.483065	0.014	0.255	6.00177e-44
Tmem100	1.1206e-46	-0.484513	0.025	0.268	3.75425e-42
Lcp1	6.47678e-80	-0.485191	0.25	0.778	2.16985e-75
Romo1	6.8418e-55	-0.486584	0.025	0.301	2.29214e-50
Scoc	1.08286e-78	-0.486857	0.307	0.852	3.6278e-74
Hnrnpk	1.51433e-74	-0.487287	0.303	0.845	5.07332e-70
Serinc3	1.12405e-72	-0.487622	0.779	0.998	3.76578e-68
Ier3ip1	1.97573e-62	-0.488808	0.053	0.38	6.6191e-58
Ptpn6	1.3903e-78	-0.491717	0.157	0.62	4.6578e-74
Tubb5	1.08199e-80	-0.493666	0.144	0.607	3.62488e-76
Snrpd2	2.90781e-51	-0.494741	0.016	0.269	9.74176e-47
Ndufa13	3.27958e-75	-0.495047	0.104	0.521	1.09873e-70
Vwa5a	4.34398e-55	-0.495216	0.053	0.351	1.45532e-50
Lims1	3.09579e-82	-0.497654	0.145	0.615	1.03715e-77
Stx7	1.28068e-77	-0.498056	0.108	0.533	4.29054e-73
Sub1	8.20653e-82	-0.498292	0.128	0.582	2.74935e-77
2023-09-07	2.76268e-76	-0.499487	0.107	0.526	9.25552e-72
1110004F10Rik	7.3843e-65	-0.500777	0.046	0.376	2.47389e-60
Mtdh	1.02877e-70	-0.501062	0.437	0.947	3.44659e-66
Cttnbp2nl	2.64631e-80	-0.504	0.273	0.818	8.86565e-76
Spcs1	1.15887e-66	-0.505623	0.072	0.432	3.88246e-62
Hprt	3.09866e-67	-0.506653	0.045	0.383	1.03811e-62
Cnbp	8.3502e-86	-0.50682	0.154	0.64	2.79748e-81
Ighm	8.26727e-95	-0.50706	0.165	0.687	2.7697e-90
Fez2	1.21037e-70	-0.507593	0.08	0.462	4.05498e-66
Pmepa1	5.54231e-65	-0.508232	0.362	0.864	1.85678e-60
Fis1	3.56838e-64	-0.508692	0.05	0.38	1.19548e-59
Nucks1	2.22016e-58	-0.509114	0.049	0.357	7.438e-54
Dbi	4.18336e-52	-0.511127	0.025	0.29	1.40151e-47
Gngt2	1.91026e-91	-0.511442	0.097	0.56	6.39977e-87
Tsn	4.48277e-68	-0.512057	0.07	0.434	1.50182e-63
Ostf1	9.78267e-85	-0.512169	0.113	0.567	3.27739e-80
Psenen	6.32042e-75	-0.512494	0.123	0.554	2.11747e-70
Mpc2	2.57656e-57	-0.51274	0.042	0.342	8.63199e-53
Pak2	4.73356e-86	-0.51309	0.145	0.627	1.58584e-81
Anp32a	8.88755e-73	-0.513556	0.084	0.474	2.97751e-68
Iscu	1.23483e-67	-0.515028	0.072	0.436	4.13691e-63
Psma4	1.6791e-67	-0.515746	0.043	0.381	5.62533e-63
2010107E04Rik	1.58415e-61	-0.516575	0.041	0.354	5.30722e-57
Serbp1	5.33881e-97	-0.517348	0.175	0.71	1.78861e-92
Mif	3.07108e-59	-0.519145	0.036	0.336	1.02887e-54
Lamtor2	4.61428e-59	-0.520313	0.029	0.323	1.54588e-54
Ndufa1	5.90234e-50	-0.521132	0.028	0.286	1.9774e-45
Pcbp1	4.83114e-89	-0.521157	0.126	0.605	1.61853e-84
Sem1	3.69519e-85	-0.521279	0.109	0.56	1.23796e-80
Eif3h	1.69261e-71	-0.522239	0.061	0.426	5.67057e-67
Snx6	4.16119e-88	-0.524067	0.104	0.56	1.39408e-83
Ptms	2.33916e-83	-0.525179	0.183	0.677	7.83664e-79
Rdx	8.48981e-75	-0.525407	0.09	0.489	2.84426e-70
Xlr	2.04178e-53	-0.526037	0.029	0.302	6.84036e-49
Chmp5	4.85846e-53	-0.526055	0.025	0.293	1.62768e-48
Park7	3.29062e-78	-0.528375	0.071	0.47	1.10242e-73
Aldoa	1.16263e-85	-0.528713	0.123	0.584	3.89505e-81
Sparc	5.06364e-76	-0.529814	0.831	0.998	1.69642e-71
Snrpb2	5.43833e-51	-0.530336	0.026	0.287	1.82195e-46
Csnk1e	1.32104e-88	-0.530891	0.188	0.709	4.42574e-84
Drap1	1.4601e-68	-0.530987	0.065	0.424	4.89162e-64
Usmg5	9.42664e-55	-0.532189	0.032	0.312	3.15811e-50
Dazap2	1.09344e-82	-0.533127	0.086	0.507	3.66324e-78
Acadm	5.64753e-54	-0.533338	0.025	0.297	1.89204e-49
Nol7	1.86084e-63	-0.533886	0.046	0.371	6.23418e-59
Arpc3	2.17324e-93	-0.534943	0.182	0.715	7.28079e-89
Ccnd1	5.49522e-60	-0.536575	0.092	0.439	1.84101e-55
Rap1a	4.96579e-95	-0.537444	0.13	0.627	1.66364e-90
Psma5	2.1236e-55	-0.539447	0.022	0.297	7.1145e-51
Lsm6	8.81881e-55	-0.539452	0.029	0.307	2.95448e-50
Rgs2	2.97068e-60	-0.539634	0.536	0.963	9.95236e-56
Oxct1	2.09416e-78	-0.54029	0.101	0.522	7.01587e-74
Taldo1	3.94977e-77	-0.540918	0.087	0.494	1.32325e-72
Cox5a	5.44161e-65	-0.542949	0.047	0.379	1.82305e-60
Rtraf	4.3719e-73	-0.542981	0.058	0.427	1.46467e-68
Prkar1a	3.89103e-85	-0.543693	0.121	0.579	1.30357e-80
Srp19	3.38906e-52	-0.5439	0.036	0.31	1.1354e-47
1810037I17Rik	1.7081e-55	-0.544635	0.034	0.319	5.72247e-51
Morf4l1	2.10908e-81	-0.545797	0.291	0.853	7.06584e-77
Smdt1	6.83737e-69	-0.546008	0.051	0.401	2.29066e-64
Ndufb10	1.60742e-66	-0.548029	0.04	0.37	5.38519e-62
Psmb1	3.0942e-74	-0.549149	0.07	0.451	1.03662e-69
Ndufb3	4.16889e-64	-0.549882	0.036	0.353	1.39666e-59
B2m	3.26761e-71	-0.5501	0.61	0.989	1.09472e-66
Fos	4.55838e-57	-0.550815	0.91	0.993	1.52715e-52
Lamtor1	4.90508e-79	-0.552667	0.076	0.481	1.6433e-74
Ost4	1.25137e-74	-0.553573	0.059	0.433	4.19236e-70
Gpx4	3.65656e-97	-0.558493	0.1	0.579	1.22502e-92
Eif1b	3.04821e-77	-0.558844	0.061	0.445	1.02121e-72
Cops9	3.6071e-69	-0.559413	0.038	0.377	1.20845e-64
Tnfaip8l2	1.05426e-81	-0.559556	0.121	0.569	3.53199e-77
Higd2a	5.55518e-73	-0.559621	0.063	0.435	1.8611e-68
Ndufv3	4.22335e-59	-0.560611	0.024	0.313	1.41491e-54
Cd164	5.48008e-80	-0.561113	0.314	0.852	1.83594e-75
Lgals9	2.58066e-79	-0.562492	0.075	0.478	8.64573e-75
Chmp2a	2.19939e-68	-0.566673	0.047	0.391	7.36838e-64
Spi1	2.52157e-94	-0.570091	0.227	0.78	8.44778e-90
Dynlrb1	3.4276e-60	-0.570457	0.026	0.322	1.14831e-55
Sumo2	1.69318e-90	-0.572078	0.086	0.535	5.67248e-86
Ndufa7	2.73896e-77	-0.575283	0.058	0.44	9.17607e-73
Cox17	4.16399e-60	-0.576703	0.032	0.331	1.39502e-55
Srp14	4.59507e-69	-0.578048	0.049	0.396	1.53944e-64
Slc25a5	5.70768e-97	-0.578803	0.249	0.818	1.91219e-92
Cox7b	2.89351e-71	-0.579035	0.041	0.388	9.69383e-67
Bin2	3.78701e-98	-0.579647	0.241	0.817	1.26873e-93
Rpsa	3.54472e-77	-0.580037	0.377	0.908	1.18755e-72
Psma6	2.34634e-58	-0.581436	0.024	0.31	7.8607e-54
Uqcr10	1.02869e-65	-0.582052	0.034	0.357	3.44632e-61
Uba52	2.68583e-84	-0.58309	0.075	0.495	8.99806e-80
Psma2	1.40282e-69	-0.584996	0.043	0.387	4.69974e-65
Atp5g1	3.77878e-78	-0.586489	0.054	0.436	1.26597e-73
Cxxc5	4.87116e-86	-0.586979	0.086	0.52	1.63194e-81
Fam212a	1.70997e-63	-0.591652	0.026	0.334	5.72873e-59
Snx3	2.8027e-71	-0.593155	0.043	0.394	9.38959e-67
Mrps33	1.62169e-61	-0.595047	0.036	0.343	5.433e-57
Snx5	7.05831e-98	-0.596374	0.232	0.806	2.36467e-93
Alox5ap	5.23572e-98	-0.596758	0.191	0.737	1.75407e-93
Ndufa3	7.25983e-68	-0.597102	0.033	0.362	2.43219e-63
Sec61b	5.89026e-84	-0.597404	0.057	0.457	1.97336e-79
Hcls1	4.51026e-79	-0.598525	0.08	0.486	1.51103e-74
Mrpl52	5.69771e-92	-0.600294	0.105	0.572	1.90885e-87
Edf1	1.95387e-85	-0.602032	0.062	0.476	6.54584e-81
Akr1a1	1.1637e-85	-0.602577	0.092	0.527	3.89863e-81
Rnf130	1.55231e-96	-0.603458	0.165	0.691	5.20054e-92
Tomm20	1.33142e-86	-0.604494	0.088	0.521	4.46053e-82
Hint1	1.51466e-95	-0.606041	0.076	0.532	5.07442e-91
Rap1b	5.30885e-97	-0.606247	0.216	0.77	1.77857e-92
Rasgrp3	1.06947e-98	-0.607574	0.174	0.702	3.58295e-94
H3f3a	9.74687e-91	-0.610646	0.307	0.884	3.2654e-86
Ywhab	1.39902e-93	-0.61065	0.117	0.595	4.687e-89
Tmem50a	1.19971e-108	-0.611381	0.22	0.803	4.01928e-104
Dnajc8	2.0925e-72	-0.617158	0.046	0.402	7.01029e-68
Atpif1	1.88147e-91	-0.619388	0.096	0.554	6.30329e-87
Psme1	8.81588e-92	-0.620299	0.095	0.549	2.9535e-87
Cox5b	1.45916e-75	-0.620844	0.057	0.431	4.88849e-71
Mpc1	6.2651e-102	-0.621438	0.109	0.608	2.09893e-97
Gm42418	6.58371e-135	-0.62411	0.967	0.999	2.20568e-130
Eif3f	1.31945e-87	-0.625183	0.075	0.506	4.42042e-83
Ppp1r18	1.8085e-87	-0.626285	0.092	0.535	6.05884e-83
Ndufa6	4.47413e-75	-0.627893	0.051	0.42	1.49892e-70
Dek	8.68975e-82	-0.630576	0.063	0.465	2.91124e-77
Pip4k2a	1.29589e-102	-0.632297	0.14	0.663	4.34148e-98
Hmgn1	1.92864e-76	-0.633437	0.058	0.437	6.46133e-72
Atp5j2	7.21108e-96	-0.635628	0.084	0.545	2.41585e-91
Rhog	7.66856e-94	-0.636317	0.075	0.522	2.56912e-89
Cdc42	9.45315e-96	-0.636794	0.35	0.922	3.167e-91
Cst3	1.79442e-142	-0.636881	0.999	1	6.01166e-138
Ran	6.29203e-82	-0.637252	0.054	0.447	2.10796e-77
Atp5k	5.30731e-64	-0.637357	0.033	0.347	1.77805e-59
Cyb5a	2.44825e-86	-0.638301	0.058	0.47	8.20211e-82
Serf2	7.75055e-102	-0.640806	0.24	0.815	2.59659e-97
Set	3.06657e-94	-0.642095	0.108	0.583	1.02736e-89
Ftl1	1.38688e-64	-0.643834	0.66	0.993	4.64634e-60
Rbx1	8.59048e-94	-0.644387	0.088	0.546	2.87798e-89
Myl12b	4.36249e-89	-0.6449	0.08	0.518	1.46152e-84
Hmgb1	9.10296e-103	-0.64497	0.206	0.769	3.04967e-98
Psmb5	1.93844e-66	-0.646725	0.03	0.352	6.49416e-62
Pycard	1.02299e-114	-0.648633	0.178	0.765	3.42723e-110
Rnf7	1.31083e-84	-0.649125	0.042	0.435	4.39154e-80
Itm2b	5.87163e-125	-0.652038	0.847	0.999	1.96711e-120
Sh3glb1	4.0999e-97	-0.652667	0.267	0.85	1.37355e-92
Atp6v1f	5.56741e-97	-0.652821	0.094	0.56	1.86519e-92
Paip2	2.10782e-81	-0.654474	0.053	0.442	7.06161e-77
Gpx1	7.32031e-108	-0.655562	0.187	0.753	2.45245e-103
Rack1	3.5005e-95	-0.656017	0.3	0.88	1.17274e-90
Rps2	2.66967e-90	-0.657888	0.316	0.87	8.94393e-86
Ndufa4	3.3748e-89	-0.659548	0.095	0.545	1.13062e-84
Uqcrq	7.17458e-84	-0.66072	0.051	0.45	2.40363e-79
Hsbp1	5.40212e-81	-0.660841	0.058	0.45	1.80982e-76
Cox7a2	6.54404e-89	-0.66426	0.049	0.459	2.19238e-84
Bnip3l	1.55936e-86	-0.66482	0.065	0.481	5.22418e-82
Myl6	6.12606e-106	-0.67062	0.145	0.682	2.05235e-101
Commd8	1.93047e-109	-0.672665	0.14	0.686	6.46746e-105
Gabarap	5.65228e-102	-0.673353	0.192	0.744	1.89363e-97
Vamp8	2.16359e-113	-0.673443	0.104	0.63	7.24846e-109
Atp5c1	2.19139e-92	-0.675242	0.069	0.505	7.34158e-88
AY036118	3.5957e-95	-0.679468	0.647	0.94	1.20463e-90
Gm10076	3.29353e-77	-0.680173	0.038	0.403	1.1034e-72
Hspe1	1.0804e-94	-0.681069	0.108	0.582	3.61957e-90
Lamtor4	7.73395e-102	-0.681558	0.078	0.551	2.59103e-97
Tbca	6.11078e-76	-0.6828	0.03	0.383	2.04723e-71
Cebpzos	1.72137e-77	-0.686409	0.041	0.409	5.76693e-73
Arl6ip1	3.18132e-111	-0.686482	0.206	0.792	1.0658e-106
Selenop	4.85648e-89	-0.689889	0.568	0.984	1.62702e-84
Cox7a2l	9.03448e-112	-0.697128	0.12	0.651	3.02673e-107
Zfp706	2.48383e-115	-0.701304	0.101	0.63	8.32131e-111
H2afz	1.81538e-109	-0.702171	0.14	0.68	6.0819e-105
Clta	2.27778e-99	-0.70281	0.373	0.934	7.63101e-95
Actb	2.38992e-154	-0.7061	0.864	1	8.00671e-150
Calm1	8.42903e-108	-0.708909	0.213	0.781	2.8239e-103
Ptpn18	5.38787e-121	-0.709938	0.169	0.758	1.80505e-116
Ywhah	1.97796e-114	-0.712245	0.229	0.83	6.62656e-110
Tomm7	9.9907e-91	-0.712589	0.051	0.469	3.34708e-86
Nsa2	1.16129e-97	-0.714327	0.071	0.526	3.89055e-93
Fcer1g	3.06624e-103	-0.717943	0.643	0.994	1.02725e-98
Krtcap2	1.68641e-89	-0.718558	0.062	0.486	5.64982e-85
Uqcr11	7.68281e-90	-0.73221	0.041	0.448	2.5739e-85
Elob	9.13548e-98	-0.732327	0.067	0.519	3.06057e-93
Nedd8	2.5317e-90	-0.732419	0.046	0.459	8.4817e-86
Tma7	2.94546e-95	-0.733591	0.061	0.499	9.86789e-91
Cox7c	9.18501e-115	-0.73501	0.157	0.717	3.07716e-110
Rps27l	3.03724e-86	-0.737005	0.028	0.411	1.01754e-81
Oaz1	2.3804e-114	-0.739806	0.238	0.834	7.9748e-110
Atp5g2	4.37224e-125	-0.746827	0.112	0.672	1.46479e-120
Rpl27	1.35525e-111	-0.752258	0.111	0.633	4.54035e-107
Brk1	8.48398e-121	-0.75343	0.115	0.667	2.8423e-116
Vapa	6.39459e-121	-0.754822	0.097	0.639	2.14232e-116
Npm1	1.64085e-114	-0.762176	0.157	0.715	5.49716e-110
Uqcrb	6.33273e-93	-0.767367	0.036	0.446	2.12159e-88
Atp5l	1.91314e-105	-0.772468	0.091	0.58	6.4094e-101
Prdx5	2.60323e-102	-0.774216	0.055	0.509	8.72134e-98
Tuba1b	2.66834e-112	-0.787556	0.115	0.642	8.93948e-108
Atp5h	4.86479e-116	-0.804671	0.061	0.558	1.6298e-111
Atp5f1	9.85538e-122	-0.812446	0.083	0.609	3.30175e-117
Atp5j	5.90014e-108	-0.812865	0.059	0.532	1.97666e-103
Chchd2	1.49306e-121	-0.814937	0.15	0.727	5.00205e-117
Lst1	1.32548e-100	-0.819957	0.084	0.551	4.44064e-96
Vdac2	2.42303e-124	-0.821633	0.117	0.671	8.11764e-120
Bri3	7.80449e-120	-0.82225	0.13	0.685	2.61466e-115
Hpgd	9.92018e-122	-0.824249	0.254	0.86	3.32346e-117
Ybx1	3.0757e-120	-0.832646	0.109	0.648	1.03042e-115
Cfl1	1.28236e-121	-0.83575	0.287	0.894	4.29617e-117
Cox6c	9.19728e-109	-0.837007	0.075	0.562	3.08127e-104
Rpl18	9.38493e-120	-0.840133	0.348	0.94	3.14414e-115
Crybb1	1.76915e-110	-0.85886	0.108	0.622	5.927e-106
Pomp	2.03e-118	-0.859742	0.097	0.626	6.8009e-114
Basp1	3.68795e-124	-0.862751	0.303	0.904	1.23554e-119
Pnp	7.46923e-135	-0.866008	0.13	0.727	2.50234e-130
Fth1	1.49055e-122	-0.873441	0.735	0.997	4.99363e-118
Atp6v1g1	7.62781e-135	-0.874641	0.082	0.641	2.55547e-130
Rpl8	9.38559e-122	-0.890337	0.357	0.941	3.14436e-117
Gnai2	1.55199e-125	-0.890767	0.345	0.94	5.19947e-121
Cox6b1	1.53515e-119	-0.897409	0.054	0.551	5.14306e-115
Capzb	5.59663e-142	-0.91405	0.103	0.69	1.87498e-137
Atp5e	1.09979e-136	-0.916536	0.101	0.676	3.6845e-132
Sh3bgrl3	3.13627e-142	-0.919352	0.171	0.796	1.05071e-137
Btf3	5.51788e-137	-0.926819	0.119	0.708	1.8486e-132
Ndufa2	1.03682e-108	-0.928943	0.037	0.492	3.47355e-104
Rnase4	3.39591e-131	-0.931516	0.278	0.886	1.1377e-126
Ppia	1.78809e-135	-0.941107	0.422	0.975	5.99047e-131
Gapdh	6.05397e-141	-0.951353	0.163	0.776	2.0282e-136
Rpl10a	4.37968e-144	-0.952606	0.261	0.903	1.46728e-139
Capza2	6.6621e-137	-0.96667	0.321	0.942	2.23194e-132
Ywhae	7.40856e-144	-0.970171	0.155	0.774	2.48202e-139
Eef1a1	4.09753e-178	-0.972759	0.694	0.998	1.37275e-173
Atox1	6.61906e-126	-0.973145	0.054	0.569	2.21752e-121
Arhgdib	1.72592e-138	-0.995949	0.087	0.653	5.78216e-134
Uqcrh	7.67672e-137	-1.0002	0.075	0.632	2.57185e-132
Rpl13	1.26947e-156	-1.00082	0.57	0.992	4.25298e-152
Cox8a	1.11804e-158	-1.00516	0.123	0.753	3.74566e-154
Rplp0	5.49922e-141	-1.00532	0.327	0.942	1.84235e-136
Rpl7a	6.57792e-144	-1.00669	0.237	0.872	2.20373e-139
Rpl4	4.28345e-152	-1.00874	0.166	0.805	1.43504e-147
Rpl31	6.44941e-160	-1.01241	0.121	0.762	2.16068e-155
P2ry12	1.09424e-164	-1.03144	0.719	0.996	3.66592e-160
Aif1	2.12485e-153	-1.0317	0.282	0.929	7.11867e-149
Ldhb	1.12336e-153	-1.03232	0.162	0.802	3.76348e-149
Rpl24	9.68705e-162	-1.03815	0.254	0.92	3.24535e-157
Tyrobp	1.32293e-179	-1.03855	0.638	0.995	4.43207e-175
Gng5	6.20534e-158	-1.04168	0.17	0.818	2.07891e-153
Naca	8.04762e-167	-1.05999	0.146	0.81	2.69611e-162
Arpc2	1.41206e-156	-1.06223	0.206	0.861	4.73069e-152
Pfdn5	6.14157e-165	-1.07605	0.119	0.759	2.05755e-160
Rpl9	7.83001e-160	-1.09356	0.341	0.955	2.62321e-155
Pfn1	5.59852e-159	-1.09704	0.137	0.772	1.87562e-154
Rpl11	1.82729e-157	-1.10556	0.379	0.965	6.12179e-153
Marcks	1.54097e-190	-1.1079	0.622	0.995	5.16256e-186
Rps15	1.61051e-161	-1.11856	0.269	0.922	5.39554e-157
Rps6	1.49513e-172	-1.14945	0.241	0.914	5.00898e-168
Rps18	5.22515e-169	-1.15291	0.299	0.949	1.75053e-164
Eef1b2	1.30627e-174	-1.15454	0.171	0.843	4.37628e-170
Rps3	4.58135e-171	-1.16217	0.374	0.971	1.53485e-166
Rpl3	1.21197e-167	-1.1654	0.279	0.934	4.06033e-163
Rpl41	1.3712e-178	-1.16637	0.411	0.977	4.59381e-174
Rpl15	3.30127e-183	-1.17739	0.253	0.927	1.10599e-178
Rpl27a	2.26388e-187	-1.1792	0.513	0.991	7.58445e-183
Cox4i1	1.21952e-183	-1.18425	0.136	0.809	4.08565e-179
Rpl10	2.4165e-176	-1.18805	0.353	0.968	8.09577e-172
Rps21	1.59462e-179	-1.20613	0.474	0.988	5.3423e-175
Rgs10	1.79854e-183	-1.20804	0.394	0.982	6.02546e-179
Rps16	5.33854e-179	-1.22242	0.333	0.966	1.78852e-174
Rpl7	1.30744e-186	-1.22735	0.26	0.935	4.38017e-182
Rps13	1.0779e-190	-1.24062	0.318	0.967	3.61118e-186
Rps19	8.58855e-187	-1.26043	0.252	0.931	2.87734e-182
Rpl14	1.04857e-195	-1.26679	0.142	0.841	3.51293e-191
Rpl35	8.95766e-192	-1.27752	0.154	0.844	3.00099e-187
Rps26	1.14294e-188	-1.28168	0.221	0.911	3.82907e-184
Rpl18a	9.76765e-203	-1.28794	0.452	0.989	3.27236e-198
Rpl5	2.45097e-195	-1.29183	0.208	0.908	8.21124e-191
Rpl29	7.76738e-197	-1.30065	0.129	0.821	2.60223e-192
Rps5	1.03948e-192	-1.30648	0.246	0.926	3.48248e-188
Rpl36	1.33696e-193	-1.30747	0.25	0.938	4.47909e-189
Rps9	9.19686e-215	-1.32263	0.455	0.988	3.08113e-210
Rpl6	5.68781e-204	-1.35831	0.321	0.967	1.90553e-199
Rpl23a	1.54125e-198	-1.36287	0.165	0.864	5.16351e-194
Rps7	2.27684e-207	-1.37946	0.221	0.927	7.62786e-203
Rpl23	8.89877e-215	-1.37954	0.416	0.986	2.98127e-210
Rpl30	1.17362e-220	-1.38032	0.431	0.989	3.93187e-216
Rpl36a	5.53478e-210	-1.38314	0.113	0.823	1.85426e-205
Rps20	4.88537e-212	-1.3837	0.294	0.965	1.6367e-207
Rpl28	2.55748e-202	-1.38907	0.279	0.951	8.56805e-198
Rps3a1	9.33533e-216	-1.41065	0.333	0.979	3.12752e-211
Fau	2.41034e-246	-1.41091	0.555	0.997	8.0751e-242
Rpl12	5.65742e-217	-1.41163	0.238	0.945	1.89535e-212
Rps8	2.89304e-219	-1.41612	0.406	0.986	9.69225e-215
Rpl19	4.89872e-220	-1.42081	0.331	0.975	1.64117e-215
Rpl37a	2.55053e-218	-1.43458	0.419	0.989	8.54478e-214
Rps17	3.51086e-220	-1.45527	0.126	0.856	1.17621e-215
Rps10	1.64476e-227	-1.46844	0.341	0.981	5.51026e-223
Rps11	1.60925e-226	-1.47339	0.328	0.978	5.39131e-222
Rps4x	2.0032e-229	-1.47904	0.349	0.981	6.71113e-225
Tpt1	9.9947e-291	-1.48151	0.611	0.998	3.34842e-286
Rplp2	1.61992e-220	-1.4878	0.281	0.965	5.42707e-216
Rps27a	1.38495e-239	-1.49958	0.378	0.987	4.63986e-235
Rpl22	6.41496e-220	-1.49979	0.163	0.895	2.14914e-215
Rpl38	7.12443e-225	-1.51784	0.244	0.946	2.38683e-220
Rpl21	8.89006e-238	-1.52023	0.3	0.98	2.97835e-233
Rpl34	1.74793e-240	-1.52073	0.303	0.979	5.85591e-236
Rpl35a	3.17809e-250	-1.52302	0.423	0.991	1.06472e-245
Rpl37	1.62829e-230	-1.54125	0.372	0.986	5.45509e-226
Rplp1	1.18844e-283	-1.55055	0.577	0.997	3.98151e-279
Rps27	5.30823e-238	-1.55344	0.37	0.986	1.77836e-233
Rps12	5.05431e-248	-1.57837	0.378	0.985	1.6933e-243
Rpl32	1.95688e-247	-1.59492	0.266	0.973	6.55595e-243
Rps14	4.08277e-244	-1.61967	0.318	0.981	1.36781e-239
Rps24	3.47072e-265	-1.6305	0.41	0.994	1.16276e-260
Rps25	5.50072e-249	-1.65084	0.212	0.954	1.84285e-244
Rps15a	1.47099e-248	-1.65086	0.279	0.973	4.92812e-244
Tmsb4x	0	-1.66464	0.912	1	0
Rpl17	8.94327e-250	-1.67279	0.236	0.967	2.99618e-245
Rps23	4.72379e-274	-1.68604	0.381	0.989	1.58256e-269
Rpl26	1.21725e-264	-1.7289	0.292	0.98	4.07804e-260
Rpl39	7.91233e-268	-1.73107	0.329	0.985	2.65079e-263
Rps28	7.33853e-262	-1.73309	0.295	0.981	2.45855e-257
Rps29	0	-1.75016	0.668	0.999	0

## Sheet: Mg6
	p_val	avg_log2FC	pct.1	pct.2	p_val_adj
Ccl12	3.37662e-39	2.19186	0.675	0.418	1.13123e-34
Ifit3	0	2.00498	0.417	0.011	0
Ifitm3	1.26757e-288	1.95898	0.468	0.047	4.24662e-284
Isg15	2.52591e-215	1.90455	0.41	0.048	8.46229e-211
Ifit2	0	1.72088	0.352	0.012	0
Ifi204	0	1.69163	0.471	0.039	0
Slfn5	0	1.64877	0.437	0.014	0
Ifi27l2a	7.71294e-214	1.60322	0.466	0.063	2.58399e-209
Bst2	2.28078e-106	1.57672	0.801	0.398	7.64108e-102
Stat1	4.20651e-154	1.46495	0.653	0.177	1.40927e-149
Rtp4	0	1.36161	0.5	0.032	0
Lgals3bp	4.15184e-114	1.3452	0.767	0.325	1.39095e-109
Parp14	2.5947e-108	1.31776	0.614	0.201	8.69278e-104
Irf7	0	1.30053	0.4	0.019	0
Slfn2	2.21333e-195	1.29349	0.636	0.128	7.41509e-191
Trim30a	1.51497e-92	1.25826	0.687	0.297	5.07544e-88
Ccl4	4.77191e-07	1.21397	0.619	0.545	0.0159868
Hspa1b	1.63347e-18	1.15966	0.568	0.383	5.47246e-14
Sp100	1.04314e-185	1.1164	0.466	0.071	3.49472e-181
Rnf213	7.40865e-111	1.10768	0.505	0.133	2.48205e-106
Oasl2	0	1.08899	0.33	0.007	0
Usp18	0	1.06244	0.347	0.01	0
Ifi209	3.92687e-273	1.04956	0.32	0.021	1.31558e-268
Ccl2	3.45993e-13	1.03947	0.415	0.276	1.15915e-08
Hspa1a	8.38715e-13	0.985112	0.687	0.532	2.80986e-08
Phf11b	5.2142e-121	0.97871	0.364	0.065	1.74686e-116
Slfn8	4.75321e-62	0.973243	0.549	0.229	1.59242e-57
Xaf1	2.99372e-127	0.955522	0.408	0.076	1.00296e-122
Ifih1	5.23819e-50	0.955163	0.318	0.096	1.7549e-45
Eif2ak2	6.59016e-62	0.915076	0.461	0.163	2.20783e-57
Irgm1	1.12033e-69	0.883024	0.391	0.112	3.75334e-65
Phf11d	5.76986e-66	0.871128	0.335	0.089	1.93302e-61
Sdc3	4.30594e-83	0.859435	0.415	0.111	1.44258e-78
Trim30d	5.09155e-57	0.847799	0.519	0.21	1.70577e-52
Ly6e	4.53643e-66	0.812916	0.981	0.901	1.51979e-61
Herc6	5.60425e-53	0.799394	0.367	0.12	1.87754e-48
Cd74	3.12899e-18	0.765948	0.299	0.147	1.04827e-13
Stat2	2.20014e-75	0.755219	0.313	0.07	7.3709e-71
Fcgr1	1.41847e-35	0.726739	0.888	0.729	4.75217e-31
H2-T23	1.27872e-37	0.696868	0.728	0.483	4.28396e-33
Sp110	1.81154e-30	0.676372	0.437	0.211	6.06901e-26
H2-D1	9.66787e-31	0.675014	0.944	0.855	3.23893e-26
Tor3a	1.80171e-23	0.674251	0.403	0.215	6.0361e-19
Tspo	1.695e-27	0.663468	0.488	0.271	5.6786e-23
Clec2d	1.24013e-31	0.659072	0.282	0.104	4.15468e-27
Ifi35	1.39256e-47	0.655645	0.41	0.153	4.66536e-43
Cd52	1.3401e-17	0.650565	0.694	0.542	4.48962e-13
Hsph1	4.75477e-11	0.638941	0.33	0.204	1.59294e-06
Parp12	1.47804e-45	0.636475	0.34	0.113	4.95172e-41
Trim12a	3.49842e-25	0.626303	0.512	0.29	1.17204e-20
Cd83	4.27475e-07	0.62558	0.386	0.279	0.0143213
Tap1	3.58162e-34	0.623784	0.352	0.142	1.19992e-29
Tnf	1.06955e-08	0.612164	0.376	0.259	0.00035832
Epsti1	2.77e-36	0.607056	0.451	0.204	9.28007e-32
Parp9	1.0251e-39	0.603813	0.376	0.148	3.43429e-35
Csf1	9.57621e-30	0.603762	0.282	0.104	3.20822e-25
Ddx58	8.03664e-44	0.578996	0.333	0.111	2.69244e-39
Ccl3	1.66826e-07	0.571671	0.694	0.562	0.00558902
Dnajb1	1.02705e-06	0.564868	0.687	0.612	0.0344084
Gbp7	1.96065e-15	0.559337	0.362	0.207	6.56858e-11
9930111J21Rik2	1.19972e-18	0.558311	0.721	0.555	4.01929e-14
H2-K1	2.11135e-20	0.550423	0.917	0.84	7.07344e-16
Dtx3l	1.66418e-26	0.536363	0.342	0.152	5.57532e-22
Lgals9	1.77665e-24	0.516407	0.672	0.447	5.95214e-20
B2m	9.59012e-40	0.510305	0.998	0.965	3.21288e-35
Hspe1	1.26272e-08	0.510144	0.675	0.55	0.000423035
Cebpb	6.46218e-07	0.509068	0.323	0.226	0.0216496
Ogfr	1.61139e-27	0.507303	0.337	0.147	5.39847e-23
Psme1	7.63047e-18	0.502576	0.701	0.516	2.55636e-13
Samhd1	2.60854e-24	0.492416	0.451	0.241	8.73913e-20
Trim12c	8.96436e-26	0.490459	0.306	0.131	3.00324e-21
Znfx1	4.46003e-17	0.478694	0.403	0.234	1.4942e-12
Adar	2.70383e-34	0.454956	0.308	0.112	9.05838e-30
Trafd1	2.59927e-17	0.443855	0.488	0.301	8.70808e-13
Zc3hav1	6.38347e-22	0.442576	0.383	0.197	2.13859e-17
Pik3ap1	3.2753e-14	0.440767	0.286	0.154	1.09729e-09
Usp25	6.9201e-19	0.436935	0.417	0.233	2.31837e-14
Egr3	1.01751e-06	0.434776	0.274	0.182	0.0340886
Gpr34	4.93503e-31	-0.512728	0.951	0.976	1.65333e-26
Fcrls	8.73551e-32	-0.606324	0.835	0.941	2.92657e-27
